# Supplementary material for: The detrimental effect of excess mobile ions in planar CH3NH3PbI3 perovskite solar cells
Source: Royal Society of Chemistry journal article supplement (doi:10.1039/c6ta05053k), 2016-01-01
Supplement: c6ta05053k1.pdf [file c6ta05053k1.pdf]

## Supporting information for

### **The Detrimental Effect of Excess Mobile Ions in planar CH<sub>3</sub>NH<sub>3</sub>PbI<sub>3</sub> Perovskite Solar Cells**

*Yuanhang Cheng,<sup>a</sup> Ho-Wa Li,<sup>a</sup> Jian Qing,<sup>a, b</sup> Qing-Dan Yang,<sup>a</sup> Zhiqiang Guan,<sup>a, b</sup>*

*Chen Liu,<sup>a</sup> Sin Hang Cheung,<sup>c</sup> Shu Kong So,<sup>c</sup> Chun-Sing Lee,<sup>a, b</sup> Sai-Wing Tsang<sup>a\*</sup>*

<sup>a</sup>Department of Physics and Materials Science, City University of Hong Kong, Hong Kong SAR, P. R. China

<sup>b</sup>Center of Super-Diamond and Advanced Films (COSDAF), City University of Hong Kong, Hong Kong SAR, P. R. China

<sup>c</sup>Department of Physics, Kong Kong Baptist University, Hong Kong SAR, P. R. China

Corresponding author: [saitsang@cityu.edu.hk](mailto:saitsang@cityu.edu.hk) (S-W Tsang)

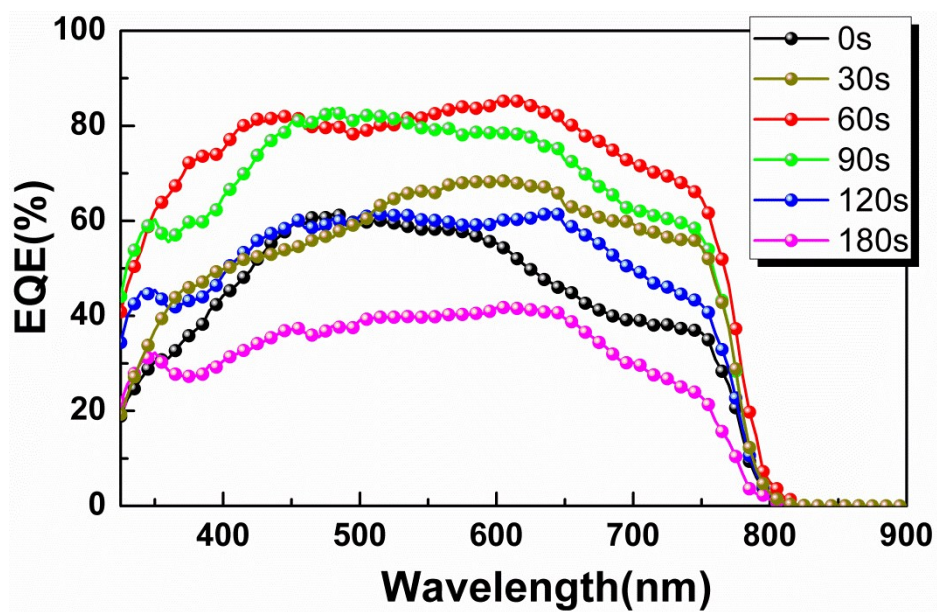

**Figure S1** EQE spectra of perovskite solar cells with different MAI loading times from 0 s to 180 s.

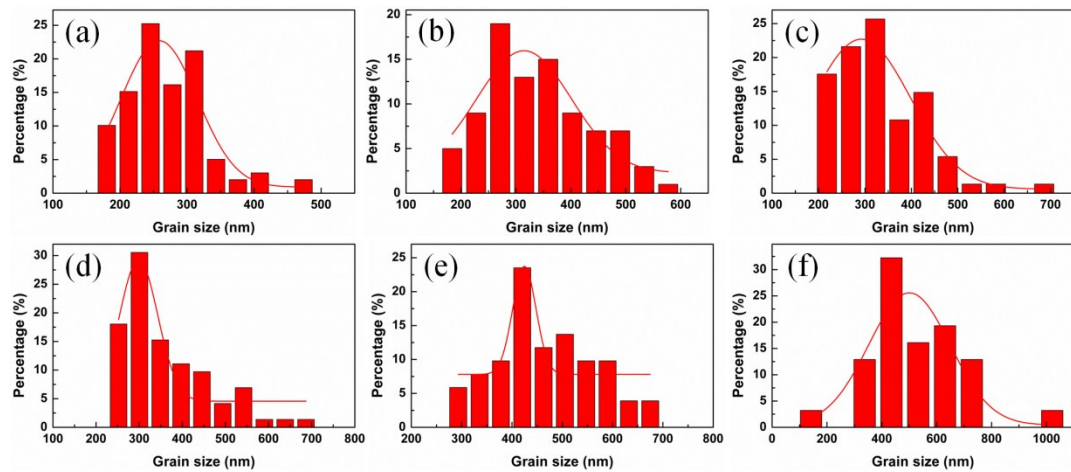

**Figure S2** The grain size distribution of perovskite films prepared with different MAI loading times ranging from (a) 0 s, (b) 30 s, (c) 60 s, (d) 90 s, (e) 120 s, and (f) 180 s.

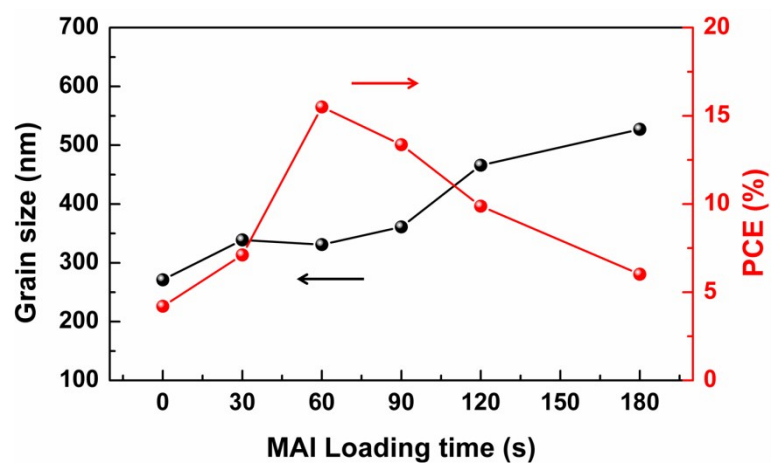

**Figure S3** Evolution of perovskite grain size and PCE of the devices upon the MAI loading time in the perovskite films preparation procedure.

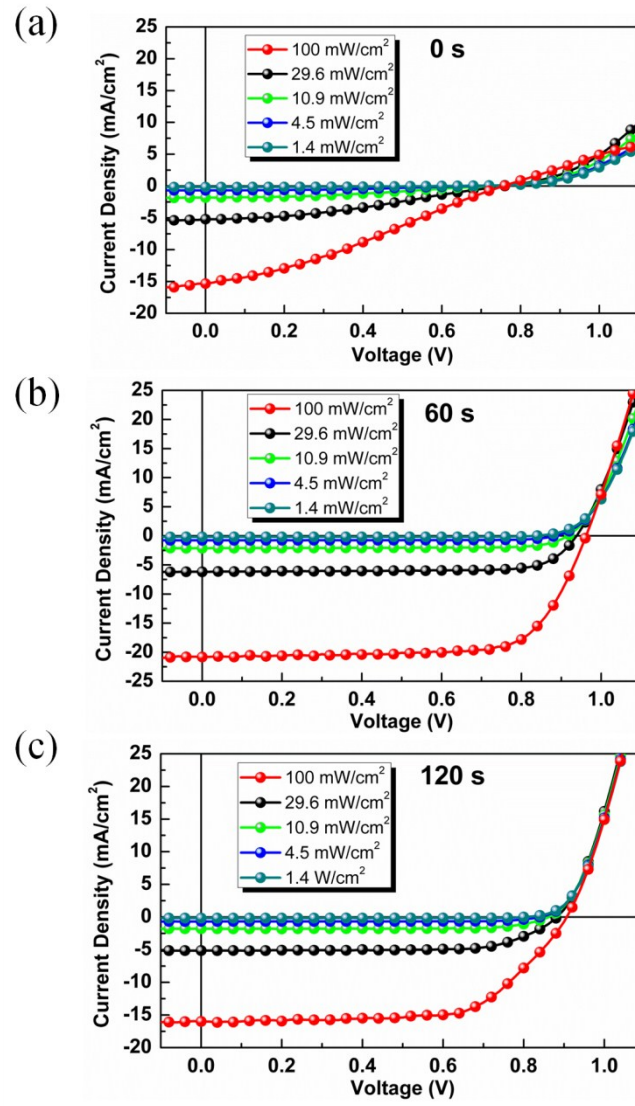

**Figure S4** Light intensity dependent  $J$ - $V$  characteristics of perovskite solar cells prepared with different MAI loading times (a) 0 s, (b) 60 s, and (c) 120 s.

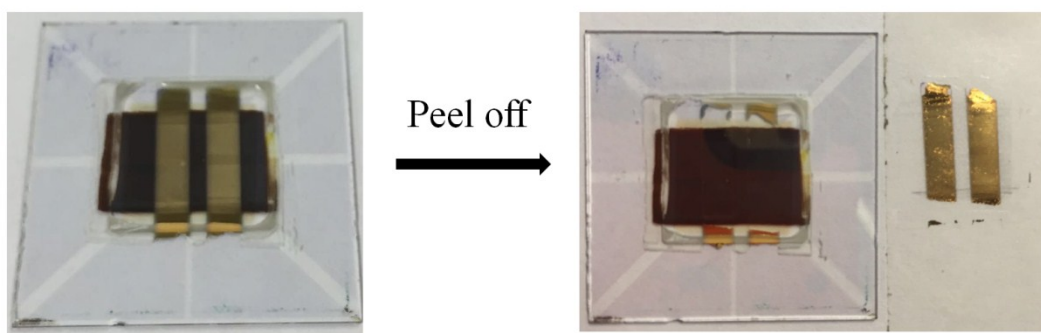

**Figure S5** Peel off the Au electrode from the perovskite solar cell using the tape for the XRD measurements.

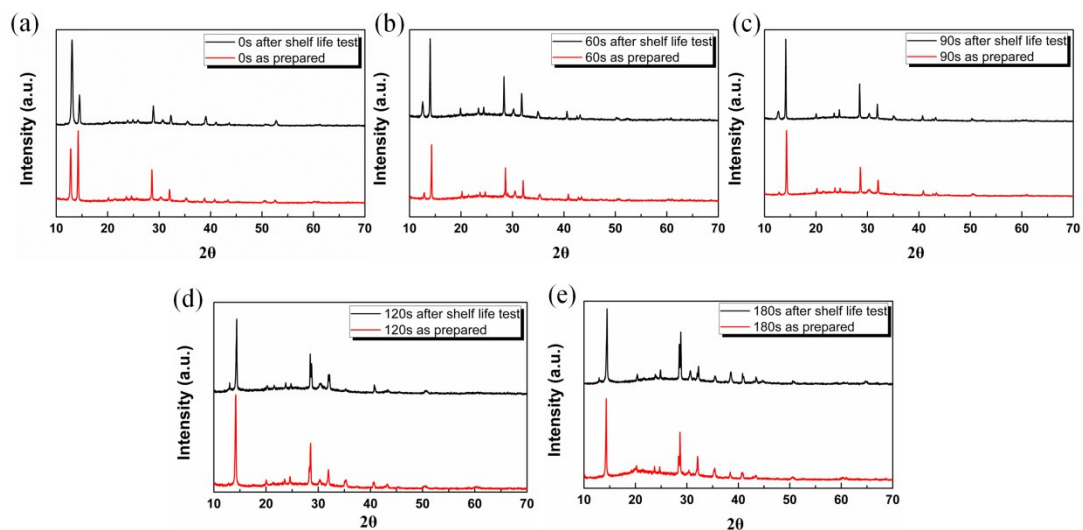

**Figure S6** XRD patterns of perovskite films prepared with different MAI loading times (a) 0 s, (b) 60 s, (c) 90 s, (d) 120 s, and (e) 180 s before and after the shelf-life tests.

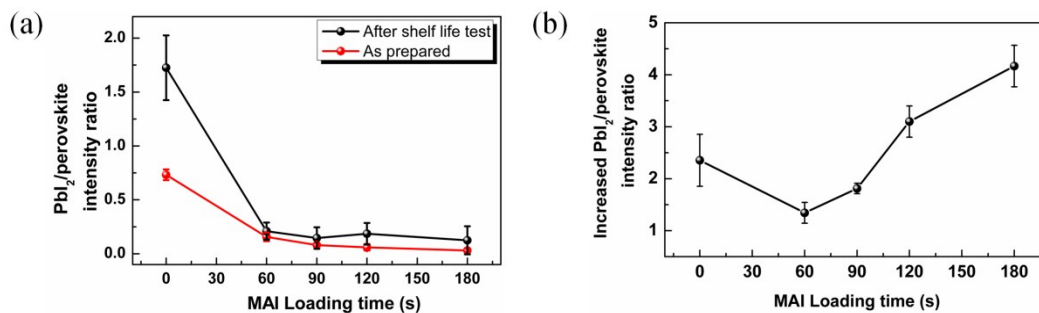

**Figure S7** (a) Intensity ratio of PbI<sub>2</sub> and perovskite extracted from the XRD patterns of perovskite films prepared with different MAI loading times. (b) Increased PbI<sub>2</sub>/perovskite intensity ratio extracted from the XRD patterns employing the following equation:

$$\text{increased PbI}_2/\text{perovskite intensity ratio} = \frac{\text{PbI}_2 / \text{perovskite (after shelf - life tests)}}{\text{PbI}_2 / \text{perovskite (before shelf - life tests)}}$$



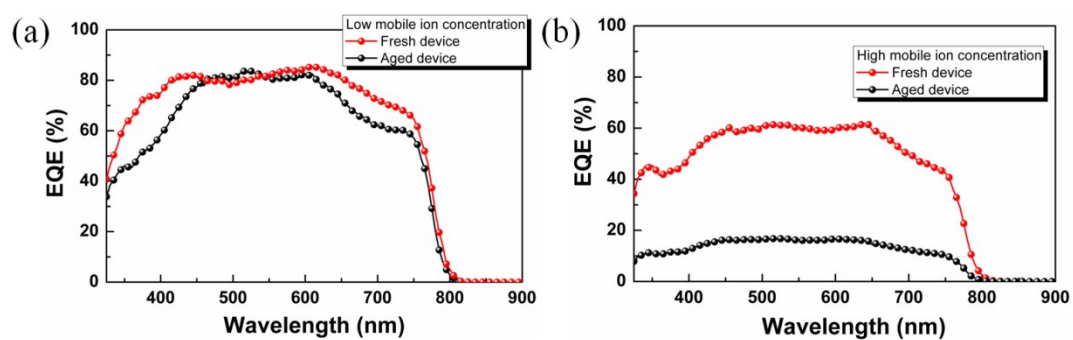

**Figure S8** EQE spectra of perovskite solar cells with low (a) and high (b) mobile ion concentration before and after shelf-life measurements.
